# Supplementary material
Source: Springer Nature journal article supplement (https://www.springermedizin.de/resource/supplementary/12884_2013_825_MOESM4_ESM.pdf/9458284)

All DFM consultations (n=148)

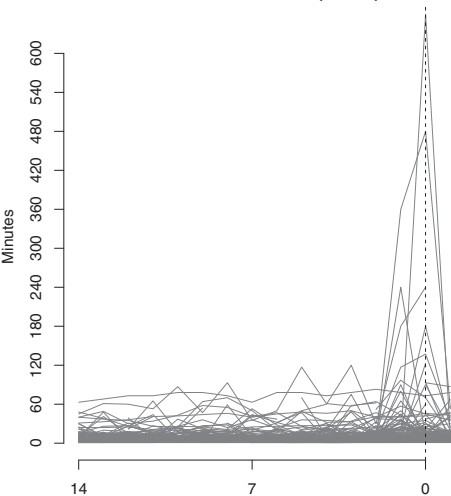

DFMs last 21 days before birth (n=76)

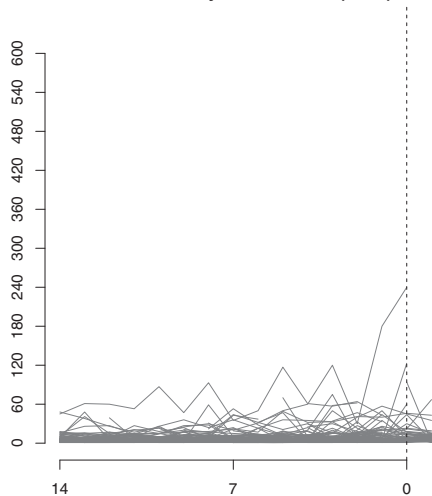

Days before DFM consultation

Supplement: MOESM4 [file 9458284]
